# Supplementary material for: A network-based cognitive training induces cognitive improvements and neuroplastic changes in patients with relapsing-remitting multiple sclerosis: an exploratory case-control study
Source: PubMed Central journal article supplement — Neural Regen Res. 2020 Nov 27;16(6):1111–20. doi: 10.4103/1673-5374.300450 (PMC8224115; doi:10.4103/1673-5374.300450), 2020-11-27
Supplement: NRR-16-1111_Suppl1.pdf [file NRR-16-1111_Suppl1.pdf]

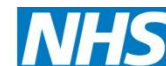

# Health Research Authority

## National Research Ethics Service

### NRES Committee Yorkshire & The Humber - Sheffield

HRA NRES Centre Manchester  
Barlow House  
3rd Floor  
4 Minshull Street  
Manchester  
M1 3DZ

Tel: 0161 625 7832  
Fax: 0161 625 7299

20 November 2013

**Ms Jodie Keyworth**  
**Research Coordinator**  
**Academic Directorate of Neurosciences**  
**Sheffield Teaching Hospitals NHS Foundation Trust**  
**N125d, N Floor**  
**Royal Hallamshire Hospital**  
**Glossop Road**  
**Sheffield**  
**S10 2JF**

Dear Ms Keyworth

|                          |                                                                                                                                                                                                                                     |
|--------------------------|-------------------------------------------------------------------------------------------------------------------------------------------------------------------------------------------------------------------------------------|
| <b>Study title:</b>      | <b>Assessment of age and disease related cognitive impairment in normal volunteers and people with degenerative and vascular brain disease and assessment of the potential neuroplastic effect of non pharmacological treatment</b> |
| <b>REC reference:</b>    | <b>12/YH/0474</b>                                                                                                                                                                                                                   |
| <b>Amendment number:</b> | <b>Amendment 01</b>                                                                                                                                                                                                                 |
| <b>Amendment date:</b>   | <b>03 October 2013</b>                                                                                                                                                                                                              |
| <b>IRAS project ID:</b>  | <b>84442</b>                                                                                                                                                                                                                        |

The above amendment was reviewed by the Sub-Committee in correspondence.

#### **Ethical opinion**

Approval was sought to add two additional patient groups. These would be patients with Multiple Sclerosis and Parkinson Disease. There would also be an additional three key collaborators.

The Committee specified that in paragraph four on page one of the Participant Information Sheets the sentence starting '*Your participant will be vital...*' should be revised as this wording is too persuasive.

The Committee also thought that the information given on page two about timings and visits could be clarified as it was not exactly clear how this would vary from four weeks to twelve weeks. Please could you revise the wording.

The members of the Committee taking part in the review gave a favourable ethical opinion of the amendment on the basis described in the notice of amendment form and supporting documentation.

### Approved documents

The documents reviewed and approved at the meeting were:

| Document                                       | Version      | Date             |
|------------------------------------------------|--------------|------------------|
| Notice of Substantial Amendment (non-CTIMPs)   | Amendment 01 | 03 October 2013  |
| Protocol                                       | 2.0          | 05 November 2013 |
| Parkinson Disease Patient Information Sheet 2  | 1.0          | 05 November 2013 |
| Parkinson Disease Consent Form 2               | 1.0          | 05 November 2013 |
| Multiple Sclerosis Patient Information Sheet 2 | 1.0          | 05 November 2013 |
| Multiple Sclerosis Consent Form 2              | 1.0          | 05 November 2013 |

### Membership of the Committee

The members of the Committee who took part in the review are listed on the attached sheet.

### R&D approval

All investigators and research collaborators in the NHS should notify the R&D office for the relevant NHS care organisation of this amendment and check whether it affects R&D approval of the research.

### Statement of compliance

The Committee is constituted in accordance with the Governance Arrangements for Research Ethics Committees and complies fully with the Standard Operating Procedures for Research Ethics Committees in the UK.

We are pleased to welcome researchers and R & D staff at our NRES committee members' training days – see details at <http://www.hra.nhs.uk/hra-training/>

|                    |                                                       |
|--------------------|-------------------------------------------------------|
| <b>12/YH/0474:</b> | <b>Please quote this number on all correspondence</b> |
|--------------------|-------------------------------------------------------|

Yours sincerely



**On behalf of  
Mr Neil Sykes  
Vice Chair**

**E-mail:** nrescommittee.yorkandhumber-sheffield@nhs.net

**Enclosures:** List of names and professions of members who took part in the review

**Copy to:**

Professor Annalena Venneri  
University of Sheffield

Dr Ramila Patel  
Sheffield Teaching Hospitals NHS Foundation Trust

**NRES Committee Yorkshire & The Humber - Sheffield**

**Attendance at Sub-Committee of the REC meeting on 20 November 2013**

| <i>Name</i>           | <i>Profession</i>                                           | <i>Capacity</i> |
|-----------------------|-------------------------------------------------------------|-----------------|
| Mrs Yvonne Stephenson | Lead Technician in the Department of Infection and Immunity | Expert          |
| Mr Neil Sykes         | Retired Engineer/ Scientist                                 | Lay Plus        |
